# Supplementary material for: Ergothioneine promotes longevity and healthy aging in male mice
Source: Springer Nature journal article supplement (doi:10.1007/s11357-024-01111-5), 2024-03-06
Supplement: 11357_2024_1111_MOESM1_ESM.pdf [file 11357_2024_1111_MOESM1_ESM.pdf]

1 **Ergothioneine promotes longevity and healthy aging in male mice**

2 Short title: Ergothioneine for healthy aging in mice

3

4 Makoto Katsube<sup>1</sup>, Takahiro Ishimoto<sup>1</sup>, Yutaro Fukushima<sup>2</sup>, Asuka Kagami<sup>2</sup>, Tsuyoshi

5 Shuto<sup>2</sup>, and Yukio Kato<sup>1,\*</sup>

6

7 <sup>1</sup> Faculty of Pharmacy, Kanazawa University, Kanazawa 920-1192, Japan

8 <sup>2</sup> Department of Molecular Medicine, Graduate School of Pharmaceutical Science,

9 Kumamoto University, Kumamoto 862-0973, Japan

10

11 **\* Corresponding author:** Yukio Kato, Ph.D.

12 Faculty of Pharmacy, Kanazawa University, Kanazawa 920-1192, Japan

13 Tel.: +81-76-234-4465

14 Fax: +81-76-234-4465

15 Email: [ykato@p.kanazawa-u.ac.jp](mailto:ykato@p.kanazawa-u.ac.jp)

16

17 *Supporting Information*

18 *Figure Legends*

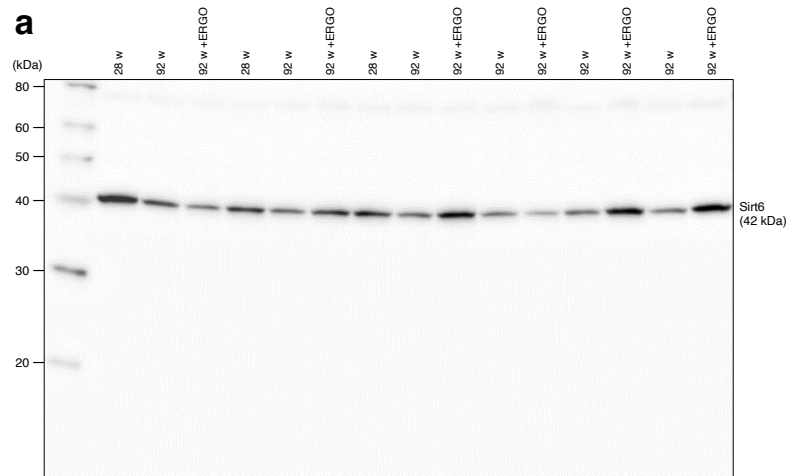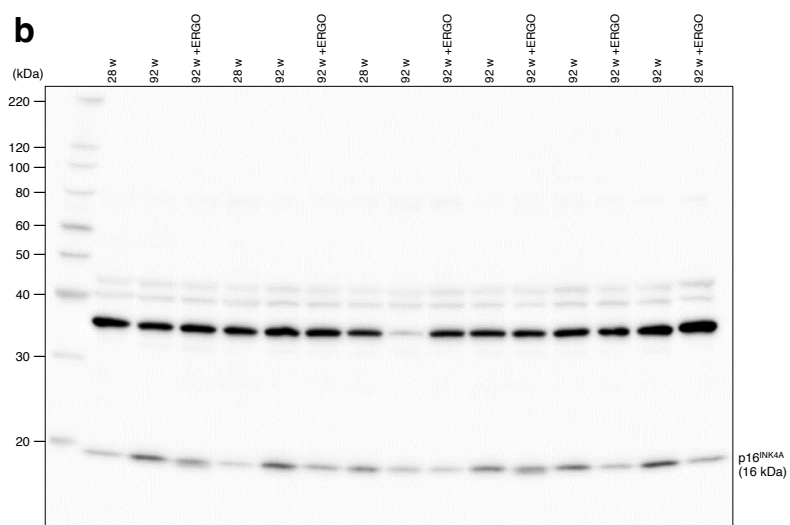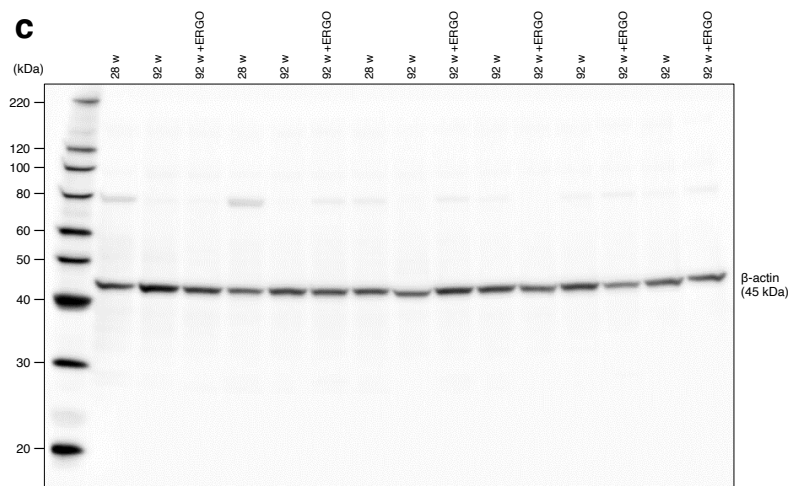

20 **Fig. S1 Western blotting (WB) analysis of the liver.** Original western blotting images

21 for (a) Sirt6, (b) p16, and (c)  $\beta$ -actin in the liver.

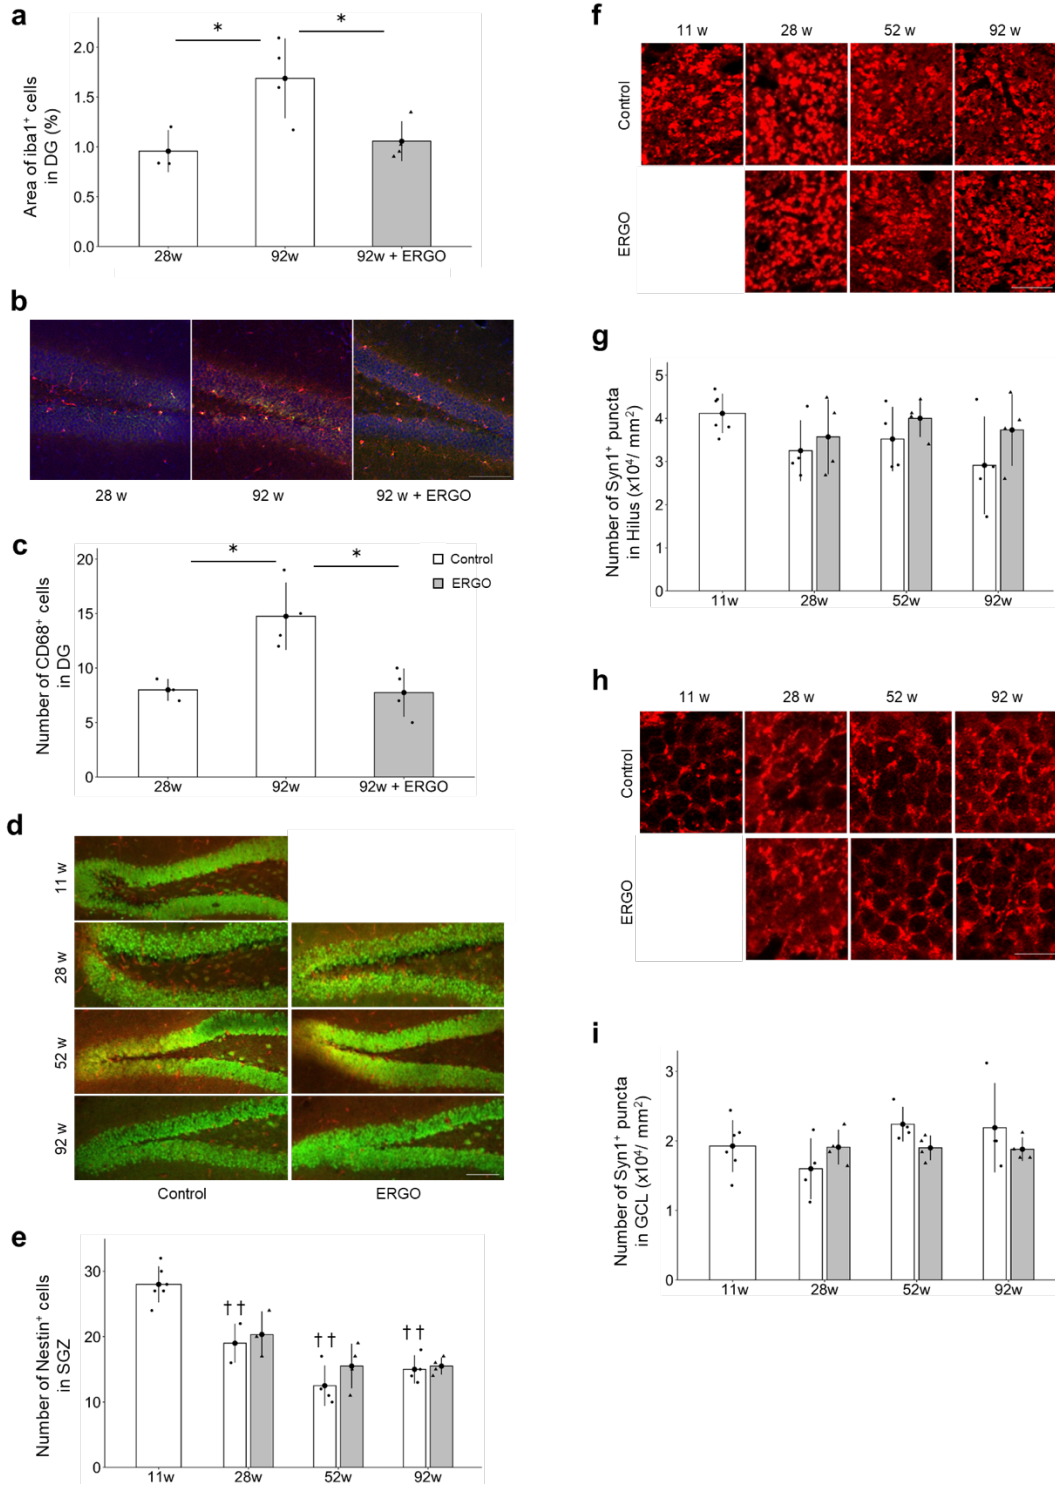

22

23 **Fig. S2 Immunohistochemical (IHC) analysis of the DG. (a)** Area of cells positive for  
24 the microglial marker Iba1 (red) in the DG. **(b)** IHC detection of the activated  
25 microglial marker CD68 (green) in the DG. **(c)** Number of CD68<sup>+</sup> cells in the DG. The  
26 white and gray columns represent the mice with daily intake of water alone (n = 3 and 4  
27 for 28 and 92 weeks, respectively) and water containing 0.055 mg/mL ERGO (n = 4 for  
28 92 weeks), respectively. Mean ± SEM; \**P* < 0.05 versus control group at 92 weeks of  
29 age (Dunnett's test). Scale bar, 100 μm. **(d)** IHC detection of the NSCs marker Nestin  
30 (red) in the SGZ. **(e)** Number of Nestin<sup>+</sup> cells in the SGZ. The white and gray columns  
31 represent the control (n = 6, 3, 4, 4 for 11, 28, 52, 92 weeks, respectively) and ERGO  
32 groups (n = 3, 4, 4 for 28, 52, 92 weeks, respectively), respectively. Mean ± SEM. ††*P*  
33 < 0.01 versus control at 11 weeks of age (Tukey's test). Scale bar, 100 μm. **(f)** IHC  
34 detection of the synapse marker Syn1 (red) in the hilus and **(h)** in the GCL. **(g)** Number  
35 of Syn1<sup>+</sup> cells in the hilus and **(i)** in the GCL. The white and gray columns represent the  
36 control (n = 6 and 4 for 11 weeks and others, respectively) and ERGO groups (n = 4 for  
37 each group), respectively. Mean ± SEM. Scale bar, 20 μm. DG, dentate gyrus; ERGO,  
38 ergothioneine; GCL, granule cell layer; IHC, immunohistochemistry; SEM, standard  
39 error of the mean; SGZ, subgranular zone.

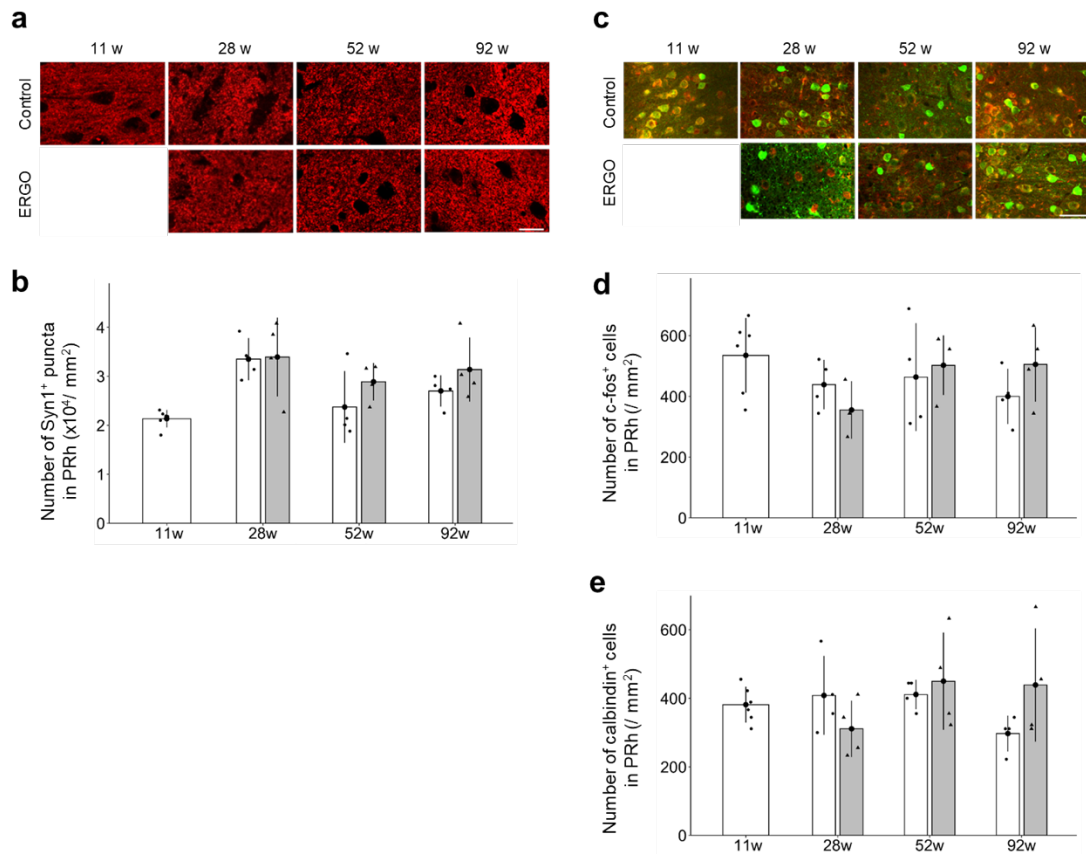

40

41 **Fig. S3 IHC analysis for PRh.** (a) IHC detection of the synapse marker Syn1 (red) in  
 42 the PRh. (b) Number of Syn1<sup>+</sup> cells in the PRh. The white and gray columns represent  
 43 the control (n = 6 and 4 for 11 weeks and others, respectively) and ERGO groups (n = 4  
 44 for each group), respectively. (c) IHC detection of the neuronal activation marker c-fos  
 45 (red) and mature neuron marker calbindin (green) in the PRh. (d) Number of c-fos<sup>+</sup> cells  
 46 in the PRh. (e) Number of calbindin<sup>+</sup> cells in the PRh. The white and gray columns  
 47 represent the control (n = 6 and 4 for 11 weeks and others, respectively) and ERGO  
 48 groups (n = 4 for each group), respectively. Mean ± SEM. Scale bar, 50 μm. PRh,  
 49 perirhinal cortex.

50 **Table S1. Schematic representation of the experimental schedule**

| Group   | n  | 7w            | 11w                   | 24w                | 28w                                  | 48w        | 52w | 78w | 88w                | 92w                                  |
|---------|----|---------------|-----------------------|--------------------|--------------------------------------|------------|-----|-----|--------------------|--------------------------------------|
| Control | 36 | survival test |                       |                    |                                      |            |     |     |                    |                                      |
|         | 32 | MRI<br>OFT    | IHC<br>LC-MS<br>ELISA |                    |                                      |            |     |     |                    |                                      |
|         | 16 |               |                       | MRI<br>OFT<br>NORT | WB<br>IHC<br>LC-MS<br>CE-MS<br>ELISA |            |     |     |                    |                                      |
|         | 16 |               |                       |                    |                                      | MRI<br>OFT | IHC |     |                    |                                      |
|         | 16 |               |                       |                    |                                      |            |     | MRI | MRI<br>OFT<br>NORT | WB<br>IHC<br>LC-MS<br>CE-MS<br>ELISA |
| ERGO    | 36 | survival test |                       |                    |                                      |            |     |     |                    |                                      |
|         | 16 |               |                       | MRI<br>OFT<br>NORT | WB<br>IHC<br>LC-MS<br>CE-MS<br>ELISA |            |     |     |                    |                                      |
|         | 16 |               |                       |                    |                                      | MRI<br>OFT | IHC |     |                    |                                      |
|         | 16 |               |                       |                    |                                      |            |     | MRI | MRI<br>OFT<br>NORT | WB<br>IHC<br>LC-MS<br>CE-MS<br>ELISA |

51 CE-MS, capillary electrophoresis time-of-flight mass spectrometry; IHC,

52 immunohistochemistry; LC-MS, liquid chromatography-tandem mass spectrometry;

53 MRI, magnetic resonance imaging; NORT, novel object recognition test; OFT, open  
54 field test; WB, western blotting.

55

## 56 *Supplemental Methods*

### 57 *Measurement of plasma ERGO level*

58 EDTA-2K was added to each blood sample, and the samples were centrifuged (1,200 g,  
59 10 min) to separate the plasma. Commercially available isotope-labeled ERGO-d9  
60 (Toronto Research Chemicals, Toronto, Canada) was used as the internal standard.

61 Simple protein precipitation with acetonitrile (ACN) was used for sample preparation  
62 before analysis. Plasma ERGO concentration was analyzed by fast ultra-high-  
63 performance liquid chromatography-tandem mass spectrometry (UHPLC-MS/MS)

64 performed with an Ultimate 3000 Nano LC System (Thermo Fisher Scientific, Waltham,  
65 USA) coupled to a TSQ Quantiva (Thermo Fisher Scientific) triple-quadrupole

66 spectrometer, as well as the internal standard. Chromatographic separation of ERGO

67 was performed using a ZIC-chILIC column (150 mm × 2.1 mm, 3 μm; 120 Å, Merck

68 Millipore Corporation) with water and 0.01% trifluoroacetic acid as mobile phase A and

69 ACN and 0.01% trifluoroacetic acid as mobile phase B under the following gradient

70 elution scheme: 0–0.5 min: 5% A/95% B; 0.5–10 min: 5% A/95% B to 80% A/20% B;

71 10–11 min: 80% A/20% B; 11–11.1 min: 80% A/20% B to 5% A/95% B; 11.1–15 min:  
72 5% A/95% B. The run time was 15 min at a constant flow rate of 0.4 mL/min. The mass  
73 spectrometer was operated under a positive electrospray ionization condition with  
74 multiple reaction monitoring (MRM) mode. The mass transitions of ERGO and ERGO-  
75 d9 were  $m/z$  230.1 > 185.9 and  $m/z$  239.2 > 195.2, respectively. Capillary voltage was  
76 3,500 V, and gas temperature was 358°C. The nitrogen sheath gas pressure for  
77 nebulizing the sample was 45 psi, with a gas flow rate of 13 L/min. Ultra-high-purity  
78 nitrogen was used as the collision gas.

79

#### 80 *Western blotting analysis*

81 Livers were excised and homogenized in RIPA buffer in the presence of the Halt  
82 protease inhibitor cocktail (Thermo Fisher Scientific, 78429, Waltham, USA). The  
83 samples were allowed to solubilize for 30 min on ice, and particulate matter was  
84 removed by centrifugation at 14,000 g for 15 min at 4°C. Aliquots of each lysate  
85 containing 20 µg of protein were separated by electrophoresis in 10–20% sodium  
86 dodecyl sulfate-polyacrylamide gel electrophoresis gels (Nacalai Tesque, 13068-24,  
87 Kyoto, Japan), and transferred to polyvinylidene fluoride membranes (Merck Millipore,  
88 IPVH07850; Burlington, USA). After blocking with non-fat dry milk for 1 h at room



89 temperature (RT), the membranes were probed with primary antibodies: anti-p16  
90 (Abcam, ab51243, Cambridge, UK, 1:5,000), anti- $\beta$ -actin (Cell Signaling Technology,  
91 4697, Danvers, USA, 1:1,000), and anti-SIRT6 (Abcam, ab191385, Cambridge, UK,  
92 1:2,000). The membranes were then incubated with HRP-linked anti-rabbit IgG  
93 secondary antibody (Cell Signaling Technology, 7074, Danvers, USA, 1:10,000), and  
94 the blots were detected using ECL™ Prime Western Blotting Detection Reagent (GE  
95 Healthcare, RPN2236, Chicago, USA). Images were captured using a  
96 Chemiluminescence Imaging System FUSION SOLO 5, and analyzed using Fusion-  
97 Capt software (Vilber-Lourmat, Marne-la-Vallée, France).

98

#### 99 *Plasma biomarker (BM) analysis*

100 Analysis of plasma BMs (creatinine, SDMA, urea, ADMA, quinolinic acid, kynurenine,  
101 tryptophan) was conducted using the HMT Dual Scan package with CE-TOF-MS based  
102 on methods described previously (Ohashi et al., 2008; Ooga et al., 2011). CE-TOF-MS  
103 analysis was conducted without standard compounds using Agilent G1600A capillary  
104 electrophoresis system (Agilent Technologies, Waldbronn, Germany) equipped with Q  
105 Exactive Plus (Thermo Fisher Scientific, Waltham, USA). The systems were controlled  
106 by Agilent G2201AA ChemStation software version B.03.01 (Agilent Technologies).

107 The spectrometer performed scans from m/z 50 to 1,000, and peaks were extracted  
108 using automatic integration software (MasterHands; Keio University, Tsuruoka, Japan)  
109 to obtain peak information, including m/z, peak area, and migration time (Sugimoto et  
110 al., 2010). Signal peaks corresponding to isotopomers, adduct ions, and other product  
111 ions of known metabolites were excluded, and the remaining peaks were annotated  
112 according to the HMT metabolite database based on their m/z values with the migration  
113 times. Areas of the annotated peaks were then normalized on the basis of the internal  
114 standard (cation mode, L-methionine sulfone; anion mode, D-camphor-10-sulfonic acid)  
115 levels, and sample amounts (mL plasma) to obtain relative levels of each metabolite.

116

### 117 *Immunohistochemistry*

118 Mice were deeply anesthetized with 5% isoflurane (Pfizer, New York, USA) and  
119 transcardially perfused with chilled 4% paraformaldehyde (PFA) in 0.02 M phosphate-  
120 buffered saline (PBS, pH 7.2), after which the whole brain was quickly dissected. The  
121 brain was postfixed in 4% PFA overnight at 4°C, washed with PBS, embedded in 4%  
122 low melting point agarose, and cut on a Neo LinearSlicer MT (NLS-MT, Dosaka,  
123 Japan) into 100- $\mu$ m-thick sections for immunostaining. The floating sections were  
124 blocked with 1% bovine serum albumin (BSA) in PBS containing 0.1% Tween20 (0.1%

125 PBST) for 30 min, followed by primary incubation with each antibody in 0.1% PBST  
126 overnight at RT: anti-doublecortin (Dcx) (Santa Cruz, SC-8066, Dallas, USA, goat,  
127 1:250), anti-NeuN (Merck Millipore, MAB377, Burlington, USA, mouse, 1:250), anti-  
128 Iba1 (Sigma-Aldrich, SAB2500041, Burlington, USA, goat, 1:250), anti-CD86 (Thermo  
129 Fisher Scientific, 14-0862-85, Waltham, USA, mouse, 1:200), anti-CD206 (Abcam,  
130 ab64693, Cambridge, USA, rabbit, 1:200), anti-TDP43 (Abcam, ab109535, Cambridge,  
131 USA, rabbit, 1:250), anti-HNMT (Proteintech, 11874-1-AP, Rosemont, USA, rabbit,  
132 1:10), anti-Nestin (Santa Cruz, sc-21249, Dallas, USA, goat, 1:250), anti-synapsin I  
133 (Sigma-Aldrich, S193, Burlington, USA, rabbit, 1:250), anti-CD68 (Thermo Fisher  
134 Scientific, MCA1957GA, Waltham, USA, rat, 1:250), anti-c-fos (Abcam, ab209794,  
135 Cambridge, USA, rabbit, 1:100), and anti-calbindin (Merck Millipore, c9848, Billerica,  
136 USA, mouse, 1:250). The sections were washed three times with 0.1% PBST, followed  
137 by incubation with secondary antibodies in 0.1% PBST overnight at RT: anti-mouse  
138 Alexa 488 (Abcam, ab150105, Cambridge, USA, donkey, 1:500), anti-goat Alexa 555  
139 (Thermo Fisher Scientific, A21432, Waltham, USA, donkey, 1:500), anti-rabbit Alexa  
140 594 (Thermo Fisher Scientific, A11037, Waltham, USA, goat, 1:500), anti-rabbit Alexa  
141 647 (Thermo Fisher Scientific, A31573, Waltham, USA, donkey, 1:500), and anti-rat  
142 Alexa 488 (Thermo Fisher Scientific, A21208, Waltham, USA, donkey, 1:500). The

143 sections were washed three times with 0.1% PBST, followed by observation under a  
144 LSM710 confocal laser scanning microscope (Carl Zeiss, Jena, Germany).

145

#### 146 *Radioenzymatic assay for HNMT*

147 The HNMT enzymatic assay was performed as described previously (Imamura et al.,  
148 1985; Hashimoto et al., 2019), with minor modifications. In brief, the obtained brain  
149 cytosol (20 µg/mL) was incubated with 2 µM histamine and 0.2 µM [methyl-<sup>3</sup>H]S-  
150 adenosyl-L-methionine (PerkinElmer, Waltham, USA). The reaction volume of each  
151 sample was 50 µL. The resulting enzymatically produced [<sup>3</sup>H]methylhistamine was  
152 extracted and measured as described below. After 30 min of incubation at 37°C, 50 µL  
153 of 1N NaOH and 600 µL of chloroform were added to the mixture. The tubes were  
154 shaken vigorously for 10 min. After centrifugation at 2,000 g, the aqueous phase was  
155 discarded, and the organic phase was washed once with 100 µL of 0.5N NaOH; 400 µL  
156 of the organic phase was then transferred to a tube. After drying in the fume hood  
157 overnight, dried samples were reconstituted with 50 µL of methanol, followed by  
158 addition of 1 mL of Clearsol I (Nakalai Tesque, Kyoto, Japan) for liquid scintillation  
159 spectrometry.

160

161 *Measurement of histamine and methylhistamine by LC-MS/MS*

162 Concentrations of histamine and methylhistamine were analyzed by LCMS-8040  
163 (Shimadzu, Kyoto, Japan) as described previously (Hashimoto et al., 2019).  
164 Chromatographic separation was performed with a ZIC-cHILIC column (150 mm × 2.1  
165 mm, 3 μm; 120 Å, Merck Millipore, Billerica, USA) using water with 0.1% formic acid  
166 as mobile phase A, and ACN with 0.1% formic acid as mobile phase B, under gradient  
167 elution: 0–2.5 min: 10% A/90% B to 20% A/80% B; 2.5–5.8 min: 20% A/80% B to  
168 50% A/50% B; 5.8–6.2 min: 50% A/50% B to 80% A/20% B; 6.2–7.5 min: 80% A/20%  
169 B; 7.5–7.7 min: 80% A/20% B to 10% A/90% B; 7.7–11.5 min: 10% A/90% B. The run  
170 time was 11.5 min at a constant flow rate of 0.4 mL/min. The injection volume was 1  
171 μL. Analyses were performed on a LabSolutions instrument. MS-MS detection was  
172 performed in positive electrospray ionization mode using the MRM acquisition mode.  
173 The MRM conditions of histamine, methylhistamine, and histamine-d4 were set at  
174 112.00 > 95.10, 126.20 > 109.00, and 116.20 > 99.20, respectively. Nitrogen was used  
175 as the nebulizer, and argon was used as the collision gas.

176

177 *Primary culture of microglia*

178 Cortical microglial cell culture was performed as described previously (Ishimoto et al.,

2018) with minor modifications. In brief, cerebral cortex isolated from 1-day-old mice were dissected and shaken at 250 rpm with 0.25% trypsin in PBS containing 5.5 mM glucose at 37°C for 15 min. Trypsinization was stopped by the addition of PBS containing 10% of horse serum and 1 mg/mL of DNase I. After centrifugation for 5 min at 350 g, cells were mechanically dissociated using a 1,000- $\mu$ L pipette tip in culture medium and plated at a density of  $2.5 \times 10^5$  cells/dish on  $\phi$ 10 cm dishes pre-coated with poly-L-lysine. Cultures were maintained at 37°C in a humidified 5% CO<sub>2</sub> incubator (Hirasawa, Tokyo, Japan) for 2 weeks, with medium change every week. After 2 weeks, cultures, including microglia and astrocytes, were washed with PBS and incubated with DMEM containing 0.05% trypsin and 0.2 mM EDTA for 1 h, followed by removal of astrocytes by washing with PBS twice. Cells attached to the bottom of plastic dishes were collected as microglia, and were used in the experiments. The collected cells were plated on 24-well dishes at a density of  $1.3 \times 10^5$  cells/cm<sup>2</sup>. The medium was replaced with DMEM containing 100  $\mu$ M histamine in the presence or absence of 500  $\mu$ M ERGO and/or 1  $\mu$ M metoprine at 24 h from the seeding, followed by collection of samples for RT-PCR at 48 h. Regarding immunostaining for HNMT and Iba1, the collected cells were plated on 24-well dishes at a density of  $5 \times 10^4$  cells/cm<sup>2</sup>. The cells were washed with PBS, fixed with 4% PFA for 20 min at RT, incubated for 30 min in

197 blocking solution (0.1% PBST containing 3% BSA) at RT, incubated overnight in 10-  
198 fold-diluted blocking solution containing anti-HNMT (Proteintech, 11874-1-AP,  
199 Rosemont, USA, rabbit, 1:25) and anti-Iba1 (Sigma-Aldrich, SAB2500041, Burlington,  
200 USA, goat, 1:500) at 4°C, washed with PBS, and then treated with anti-goat Alexa555  
201 (Thermo Fisher Scientific, A21432, Waltham, USA, donkey, 1:500) and anti-rabbit  
202 Alexa647 (Thermo Fisher Scientific, A31573, Waltham, USA, donkey, 1:500) at RT for  
203 2 h. The cells were washed again with PBS, treated with mounting medium including  
204 DAPI, and observed under a LSM710 confocal laser scanning microscope.

205

206

## 207 *References*

208 Hashimoto, N., Nakamichi, N., Nanmo, H., Kimura, K.-I., Masuo, Y., Sakai,  
209 Y.,...Kato, Y. (2019). Metabolome analysis reveals dermal histamine  
210 accumulation in murine dermatitis provoked by genetic deletion of P-  
211 glycoprotein and breast cancer resistance protein. *Pharmaceutical Research*,  
212 36(11), 158. <https://doi.org/10.1007/s11095-019-2695-3>

213 Imamura, S., Tachibana, T., & Taniguchi, S. (1985). Impaired histamine metabolism  
214 in the Arthus reaction induced in guinea-pig skin. *Archives of*

215                    *Dermatological Research*,                    277(4),                    313–317.

216                    <https://doi.org/10.1007/BF00509087>

217                    Ishimoto, T., Nakamichi, N., Nishijima, H., Masuo, Y., & Kato, Y. (2018).

218                    Carnitine/organic cation transporter OCTN1 negatively regulates activation

219                    in murine cultured microglial cells. *Neurochemical Research*, 43(1), 116–

220                    128. <https://doi.org/10.1007/s11064-017-2350-5>

221                    Ohashi, Y., Hirayama, A., Ishikawa, T., Nakamura, S., Shimizu, K., Ueno, Y., . . . Soga,

222                    T. (2008). Depiction of metabolome changes in histidine-starved *Escherichia*

223                    *coli* by CE-TOFMS. *Molecular Biosystems*, 4(2), 135–147.

224                    <https://doi.org/10.1039/B714176A>

225                    Ooga, T., Sato, H., Nagashima, A., Sasaki, K., Tomita, M., Soga, T., & Ohashi, Y.

226                    (2011). Metabolomic anatomy of an animal model revealing homeostatic

227                    imbalances in dyslipidaemia. *Molecular Biosystems*, 7(4), 1217–1223.

228                    <https://doi.org/10.1039/C0MB00141D>

229                    Sugimoto, M., Wong, D. T., Hirayama, A., Soga, T., & Tomita, M. (2010). Capillary

230                    electrophoresis mass spectrometry-based saliva metabolomics identified

231                    oral, breast and pancreatic cancer-specific profiles. *Metabolomics*, 6(1), 78–



232

95. <https://doi.org/10.1007/s11306-009-0178-y>

233
